# Supplementary material for: Barriers to HIV testing and characteristics associated with never testing among gay and bisexual men attending sexual health clinics in Sydney
Source: PubMed Central journal article supplement (PMC4552862; doi:10.7448/ias.18.1.20221), 2015-08-27
Supplement: JIAS-18-20221-s001.pdf [file JIAS-18-20221-s001.pdf]

**Supplementary File 1 – Questions from participant questionnaire**

1. Do you think of yourself as

<sup>1</sup>Gay/homosexual    <sup>2</sup>Bisexual    <sup>3</sup>Heterosexual

<sup>4</sup>Other (please specify)

2. How old are you?

Years

3. What is your postcode or suburb where you live?

Postcode  or

4. Have you ever had an HIV test?

<sup>1</sup>Yes <sup>2</sup>No <sup>3</sup>Don't know/Unsure

5. When did you last test for HIV?

<sup>1</sup>Less than a week ago <sup>2</sup>1-4 weeks ago <sup>3</sup>1-6 months ago <sup>4</sup>7-12 months ago

<sup>5</sup>1-2 years ago <sup>6</sup>2-4 years ago <sup>7</sup>More than 4 years ago <sup>8</sup>Never tested

6. Which of the following best describes your usual frequency of HIV testing?

<sup>1</sup>Every 3 months (or more) <sup>2</sup>Twice a year <sup>3</sup>Once a year <sup>4</sup>Less than once a year

<sup>5</sup>I have never been tested before

7. Why are you having a HIV test today? (choose the most important reasons for you and leave those that do not apply to you blank)

<sup>1</sup>I wanted to know my HIV status

<sup>2</sup>It's part of my regular HIV testing pattern

<sup>3</sup>I did something that may have put me at risk of HIV

<sup>4</sup>I have a new regular sexual partner

<sup>5</sup>My doctor/nurse/counsellor suggested I have the test

<sup>6</sup>I have had symptoms that worried me

<sup>7</sup>My regular sexual partner & I both agreed to get tested

<sup>8</sup>My regular sexual partner has done something risky

<sup>9</sup>I had sex with a HIV-positive partner

<sup>10</sup>I had a condom break when I was having sex

<sup>11</sup>I have taken HIV PEP (PEP medication may prevent HIV infection after unsafe sex)

<sup>12</sup>Other (specify)

8. Which of the following make it **less likely** for you to have a HIV test? (choose the most important reasons for you and leave those that do not apply to you blank)

- <sup>1</sup> I am scared of getting a HIV positive test result
- <sup>2</sup> I have been tested recently
- <sup>3</sup> I haven't done anything to put me at risk of HIV
- <sup>4</sup> I don't know where to go for a HIV test
- <sup>5</sup> It's difficult to find the time to get tested
- <sup>6</sup> It's difficult to get an appointment
- <sup>7</sup> It costs too much to get tested
- <sup>8</sup> I don't like showing my Medicare card when I get tested
- <sup>9</sup> I don't like having a discussion with the doctor/nurse/counsellor about getting tested
- <sup>10</sup> I don't like having blood taken for the test
- <sup>11</sup> I don't like needles/syringes
- <sup>12</sup> It's stressful waiting for the test result
- <sup>13</sup> It's annoying to have to return for the test result

9. Do you **currently** have sex with **casual** male partners?

- <sup>1</sup> Yes <sup>2</sup> No

10. Do you **currently** have sex with a **regular** male partner (or partners)?

- <sup>1</sup> Yes <sup>2</sup> No

11. If you have a **regular** male partner, do you know the result of his HIV antibody test?

- <sup>1</sup> Positive <sup>2</sup> I don't know/he hasn't had a test <sup>3</sup> Negative <sup>4</sup> No regular partner

12. How would you describe your sexual relationship with your current **regular** male partner? (choose one)

- <sup>1</sup> I have **no** current regular male partner
- <sup>2</sup> We are monogamous – **neither of us** has casual sex
- <sup>3</sup> **Both my partner and I** have casual sex with other men
- <sup>4</sup> I have casual sex with other men but **my partner doesn't**
- <sup>5</sup> **My partner** has casual sex with other men but **I do not**
- <sup>6</sup> I have **several regular** male partners

13. How many different men have you had sex with in the last 6 months?

- <sup>1</sup> None <sup>2</sup> One <sup>3</sup> 2-5 men <sup>4</sup> 6-10 men <sup>5</sup> 11-20 men <sup>6</sup> 21-50 men <sup>7</sup> More than 50 men

14. In the last 6 months, how often did you use condoms for anal sex with **casual** male partners?

- <sup>1</sup> Never <sup>2</sup> Sometimes <sup>3</sup> Always
- <sup>4</sup> No anal sex with casual partners in the last 6 months
- <sup>5</sup> No casual partners in the last 6 months

15. In the last 6 months, how often did you use condoms for anal sex with your **regular** male partner(s)?

- <sup>1</sup> Never <sup>2</sup> Sometimes <sup>3</sup> Always
- <sup>4</sup> No anal sex with regular partners in the last 6 months
- <sup>5</sup> No regular partners in the last 6 months
