# Supplementary material for: Barriers to HIV testing and characteristics associated with never testing among gay and bisexual men attending sexual health clinics in Sydney
Source: PubMed Central journal article supplement (PMC4552862; doi:10.7448/ias.18.1.20221), 2015-08-27
Supplement: JIAS-18-20221-s002.pdf [file JIAS-18-20221-s002.pdf]

**Supplementary Table 1. Barriers to more frequent HIV testing by identity**

| Barrier                                        | Gay-identified N <sup>a</sup> (%) | Non-gay-identified N <sup>a</sup> (%) | Total N <sup>a</sup> (%) | Test & p-value                     |
|------------------------------------------------|-----------------------------------|---------------------------------------|--------------------------|------------------------------------|
| It's annoying to have to return for results    | 287 (30.0)                        | 43 (31.4)                             | 330 (30.2)               | $\chi^2=0.1$ , p=0.75              |
| I haven't done anything risky                  | 279 (29.2)                        | 45 (32.9)                             | 324 (29.6)               | $\chi^2=0.8$ , p=0.38              |
| It's stressful waiting for the test result     | 269 (28.1)                        | 41 (29.9)                             | 310 (28.4)               | $\chi^2=0.2$ , p=0.66              |
| I'm scared of a positive result                | 255 (26.7)                        | 45 (32.9)                             | 300 (27.5)               | $\chi^2=2.3$ , p=0.13              |
| I have been tested recently                    | 228 (23.9)                        | 26 (19.0)                             | 254 (23.2)               | $\chi^2=1.6$ , p=0.21              |
| It's difficult to find the time to be tested   | 202 (21.1)                        | 23 (16.8)                             | 225 (20.6)               | $\chi^2=1.4$ , p=0.24              |
| I don't like needles/syringes                  | 91 (9.5)                          | 13 (9.5)                              | 104 (9.5)                | $\chi^2<0.1$ , p=0.99              |
| I don't like having blood taken for the test   | 56 (5.9)                          | 8 (5.8)                               | 64 (5.9)                 | $\chi^2<0.1$ , p=0.99              |
| It's difficult to get an appointment           | 44 (4.6)                          | 5 (3.7)                               | 49 (4.5)                 | $\chi^2=0.3$ , p=0.83 <sup>b</sup> |
| I don't like to show my Medicare card          | 23 (2.4)                          | 14 (10.2)                             | 37 (3.4)                 | $\chi^2=22.4$ , p<0.01             |
| I don't like having a discussion about testing | 19 (1.9)                          | 8 (5.8)                               | 27 (2.5)                 | $\chi^2=7.4$ , p<0.01              |
| It costs too much to get tested                | 20 (2.1)                          | 3 (2.2)                               | 23 (2.1)                 | $\chi^2<0.1$ , p=1.00 <sup>b</sup> |
| I don't know where to go for a HIV test        | 16 (1.7)                          | 4 (2.9)                               | 20 (1.8)                 | $\chi^2=1.0$ , p=0.30 <sup>b</sup> |

<sup>a</sup> Missing data included; <sup>b</sup> Fisher's exact test

**Supplementary Table 2. Barriers to more frequent HIV testing by age**

| Barrier                                        | Age <25 years N <sup>a</sup> (%) | Age ≥25 years N <sup>a</sup> (%) | Total N <sup>a</sup> (%) | Test & p-value                     |
|------------------------------------------------|----------------------------------|----------------------------------|--------------------------|------------------------------------|
| It's annoying to have to return for results    | 60 (27.5)                        | 270 (30.9)                       | 330 (30.2)               | $\chi^2=0.9$ , p=0.34              |
| I haven't done anything risky                  | 59 (27.1)                        | 265 (30.3)                       | 324 (29.6)               | $\chi^2=0.9$ , p=0.35              |
| It's stressful waiting for the test result     | 68 (31.2)                        | 242 (27.7)                       | 310 (28.4)               | $\chi^2=1.1$ , p=0.30              |
| I'm scared of a positive result                | 80 (36.7)                        | 220 (25.1)                       | 300 (27.5)               | $\chi^2=11.7$ , p<0.01             |
| I have been tested recently                    | 49 (22.5)                        | 205 (23.4)                       | 254 (23.2)               | $\chi^2=0.1$ , p=0.77              |
| It's difficult to find the time to be tested   | 46 (21.1)                        | 179 (20.5)                       | 225 (20.6)               | $\chi^2<0.1$ , p=0.83              |
| I don't like needles/syringes                  | 28 (12.8)                        | 76 (8.7)                         | 104 (9.5)                | $\chi^2=3.5$ , p=0.06              |
| I don't like having blood taken for the test   | 15 (6.9)                         | 49 (5.6)                         | 64 (5.9)                 | $\chi^2=0.5$ , p=0.47              |
| It's difficult to get an appointment           | 6 (2.8)                          | 43 (4.9)                         | 49 (4.5)                 | $\chi^2=1.9$ , p=0.17              |
| I don't like to show my Medicare card          | 4 (1.8)                          | 33 (3.8)                         | 37 (3.4)                 | $\chi^2=2.0$ , p=0.21 <sup>b</sup> |
| I don't like having a discussion about testing | 5 (2.3)                          | 22 (2.5)                         | 27 (2.5)                 | $\chi^2<0.1$ , p=1.00 <sup>b</sup> |
| It costs too much to get tested                | 1 (0.5)                          | 22 (2.5)                         | 23 (2.1)                 | $\chi^2=3.6$ , p=0.06 <sup>b</sup> |
| I don't know where to go for a HIV test        | 6 (2.8)                          | 14 (1.6)                         | 20 (1.8)                 | $\chi^2=1.3$ , p=0.26              |

<sup>a</sup> Missing data included; <sup>b</sup> Fisher's exact test

**Supplementary Table 3. Barriers to more frequent HIV testing by location**

| Barrier                                        | <2% gay couples <sup>a</sup> N <sup>b</sup> (%) | ≥2% gay couples <sup>a</sup> N <sup>b</sup> (%) | Total N <sup>b</sup> (%) | Test & p-value        |
|------------------------------------------------|-------------------------------------------------|-------------------------------------------------|--------------------------|-----------------------|
| It's annoying to have to return for results    | 172 (28.1)                                      | 158 (32.9)                                      | 330 (30.2)               | $\chi^2=2.9$ , p=0.09 |
| I haven't done anything risky                  | 187 (30.6)                                      | 137 (28.5)                                      | 324 (29.6)               | $\chi^2=0.6$ , p=0.46 |
| It's stressful waiting for the test result     | 164 (26.8)                                      | 146 (30.4)                                      | 310 (28.4)               | $\chi^2=1.7$ , p=0.20 |
| I'm scared of a positive result                | 177 (28.9)                                      | 123 (25.6)                                      | 300 (27.5)               | $\chi^2=1.5$ , p=0.22 |
| I have been tested recently                    | 128 (20.9)                                      | 126 (26.2)                                      | 254 (23.2)               | $\chi^2=4.2$ , p=0.04 |
| It's difficult to find the time to be tested   | 119 (19.4)                                      | 106 (22.0)                                      | 225 (20.6)               | $\chi^2=1.1$ , p=0.29 |
| I don't like needles/syringes                  | 64 (10.5)                                       | 40 (8.3)                                        | 104 (9.5)                | $\chi^2=1.4$ , p=0.23 |
| I don't like having blood taken for the test   | 37 (6.1)                                        | 27 (5.6)                                        | 64 (5.9)                 | $\chi^2=0.1$ , p=0.76 |
| It's difficult to get an appointment           | 20 (3.3)                                        | 29 (6.0)                                        | 49 (4.5)                 | $\chi^2=4.8$ , p=0.03 |
| I don't like to show my Medicare card          | 26 (4.3)                                        | 11 (2.3)                                        | 37 (3.4)                 | $\chi^2=3.2$ , p=0.08 |
| I don't like having a discussion about testing | 18 (2.9)                                        | 9 (1.9)                                         | 27 (2.5)                 | $\chi^2=1.3$ , p=0.26 |
| It costs too much to get tested                | 12 (2.0)                                        | 11 (2.3)                                        | 23 (2.1)                 | $\chi^2=0.1$ , p=0.71 |
| I don't know where to go for a HIV test        | 11 (1.8)                                        | 9 (1.9)                                         | 20 (1.8)                 | $\chi^2<0.1$ , p=0.93 |

<sup>a</sup> Proportion of couples in suburb that are gay men; <sup>b</sup> Missing data included

**Supplementary Table 4. Barriers to more frequent HIV testing by risk behaviour**

| Barrier                                        | UAIC N <sup>a</sup> (%) | No UAIC N <sup>a</sup> (%) | Total N <sup>a</sup> (%) | Test & p-value        |
|------------------------------------------------|-------------------------|----------------------------|--------------------------|-----------------------|
| It's annoying to have to return for results    | 112 (29.6)              | 218 (30.5)                 | 330 (30.2)               | $\chi^2=0.1$ , p=0.74 |
| I haven't done anything risky                  | 100 (26.4)              | 224 (31.4)                 | 324 (29.6)               | $\chi^2=3.0$ , p=0.08 |
| It's stressful waiting for the test result     | 100 (26.4)              | 210 (29.4)                 | 310 (28.4)               | $\chi^2=1.1$ , p=0.29 |
| I'm scared of a positive result                | 120 (31.7)              | 180 (25.2)                 | 300 (27.5)               | $\chi^2=5.2$ , p=0.02 |
| I have been tested recently                    | 86 (22.7)               | 168 (23.5)                 | 254 (23.2)               | $\chi^2=0.1$ , p=0.76 |
| It's difficult to find the time to be tested   | 86 (22.7)               | 139 (19.5)                 | 225 (20.6)               | $\chi^2=1.6$ , p=0.21 |
| I don't like needles/syringes                  | 40 (10.6)               | 64 (9.0)                   | 104 (9.5)                | $\chi^2=0.7$ , p=0.39 |
| I don't like having blood taken for the test   | 29 (7.5)                | 35 (4.9)                   | 64 (5.9)                 | $\chi^2=3.4$ , p=0.07 |
| It's difficult to get an appointment           | 17 (4.5)                | 32 (4.5)                   | 49 (4.5)                 | $\chi^2<0.1$ , p=1.00 |
| I don't like to show my Medicare card          | 13 (3.4)                | 24 (3.4)                   | 37 (3.4)                 | $\chi^2<0.1$ , p=0.95 |
| I don't like having a discussion about testing | 11 (2.9)                | 16 (2.2)                   | 27 (2.5)                 | $\chi^2=0.5$ , p=0.50 |
| It costs too much to get tested                | 10 (2.6)                | 13 (1.8)                   | 23 (2.1)                 | $\chi^2=0.8$ , p=0.37 |
| I don't know where to go for a HIV test        | 7 (1.9)                 | 13 (1.8)                   | 20 (1.8)                 | $\chi^2<0.1$ , p=0.96 |

<sup>a</sup> Missing data included; UAIC=unprotected anal intercourse with casual male partners in the last 6 months

**Supplementary Table 5. Barriers to more frequent HIV testing by partner numbers**

| Barrier                                        | ≤10 partners <sup>a</sup> N <sup>b</sup> (%) | >10 partners <sup>a</sup> N <sup>b</sup> (%) | Total N <sup>b</sup> (%) | Test & p-value                     |
|------------------------------------------------|----------------------------------------------|----------------------------------------------|--------------------------|------------------------------------|
| It's annoying to have to return for results    | 222 (28.2)                                   | 108 (35.3)                                   | 330 (30.2)               | $\chi^2=5.3$ , p=0.02              |
| I haven't done anything risky                  | 248 (31.5)                                   | 76 (24.8)                                    | 324 (29.6)               | $\chi^2=4.7$ , p=0.03              |
| It's stressful waiting for the test result     | 219 (27.8)                                   | 91 (29.7)                                    | 310 (28.4)               | $\chi^2=0.4$ , p=0.53              |
| I'm scared of a positive result                | 224 (28.5)                                   | 76 (24.8)                                    | 300 (27.5)               | $\chi^2=1.5$ , p=0.23              |
| I have been tested recently                    | 178 (22.6)                                   | 76 (24.8)                                    | 254 (23.2)               | $\chi^2=0.6$ , p=0.44              |
| It's difficult to find the time to be tested   | 153 (19.4)                                   | 72 (23.5)                                    | 225 (20.6)               | $\chi^2=2.3$ , p=0.13              |
| I don't like needles/syringes                  | 74 (9.4)                                     | 30 (9.8)                                     | 104 (9.5)                | $\chi^2<0.1$ , p=0.84              |
| I don't like having blood taken for the test   | 48 (6.1)                                     | 16 (5.2)                                     | 64 (5.9)                 | $\chi^2=0.3$ , p=0.58              |
| It's difficult to get an appointment           | 34 (4.3)                                     | 15 (4.9)                                     | 49 (4.5)                 | $\chi^2=0.2$ , p=0.68              |
| I don't like to show my Medicare card          | 28 (3.6)                                     | 9 (2.9)                                      | 37 (3.4)                 | $\chi^2=0.3$ , p=0.61              |
| I don't like having a discussion about testing | 16 (2.0)                                     | 11 (3.6)                                     | 27 (2.5)                 | $\chi^2=2.2$ , p=0.14              |
| It costs too much to get tested                | 19 (2.4)                                     | 4 (1.3)                                      | 23 (2.1)                 | $\chi^2=1.3$ , p=0.35 <sup>c</sup> |
| I don't know where to go for a HIV test        | 16 (2.0)                                     | 4 (1.3)                                      | 20 (1.8)                 | $\chi^2=0.7$ , p=0.62 <sup>c</sup> |

<sup>a</sup> Number of male sexual partners in the last 6 months; <sup>b</sup> Missing data included; <sup>c</sup> Fisher's exact test
